# Supplementary material for: Mapping Coastal Wetlands and Their Dynamics in the Yellow River Delta over Last Three Decades: Based on a Spectral Endmember Space
Source: MDPI journal article supplement (doi:10.3390/rs15205003), 2023-10-18
Supplement: s1 [file s1]

# Mapping Coastal Wetlands and Their Dynamics in the Yellow River Delta over Last Three Decades: Based on a Spectral Endmember Space

Kun Tan <sup>1,2</sup>, Danfeng Sun <sup>1</sup>, Wenjun Dou <sup>3</sup>, Bin Wang <sup>3</sup>, Qiangqiang Sun <sup>1</sup>, Xiaojie Liu <sup>4</sup>, Haiyan Zhang <sup>4</sup>, Yang Lan <sup>5</sup> and Fei Lun <sup>1,2,\*</sup>

<sup>1</sup> College of Land Science and Technology, China Agricultural University, Beijing 100193, China; b20203210944@cau.edu.cn (K.T.); sundf@cau.edu.cn (D.S.); qiangsun@cau.edu.cn (Q.S.)

<sup>2</sup> Key Laboratory of Southeast Coast Marine Information Intelligent Perception and Application, Ministry of Natural Resources, Zhangzhou 363000, China

<sup>3</sup> Yantai Geological Survey Center of Coastal Zone, China Geological Survey, Yantai 264000, China; douwenjun@mail.cgs.gov.cn (W.D.); wbing@mail.cgs.gov.cn (B.W.)

<sup>4</sup> Key Laboratory of Natural Resource Coupling Process and Effects, Institute of Geographic Sciences and Natural Resources Research, Chinese Academy of Sciences, Beijing 100101, China; liuxj@igsrr.ac.cn (X.L.); zhanghaiyan823@163.com (H.Z.)

<sup>5</sup> The Bartlett School of Environment, Energy and Resources, University College London, London WC1E 6BT, UK; ucbq737@ucl.ac.uk

\* Correspondence: lunfei@cau.edu.cn

This file includes:

## Supplementary Figures S1-S5

**Figure S1.** Eigenvalues ordered highest to zero, and cumulative PC variance (%). The cumulative variance of the three primary PCs (PC1 to PC3), was greater than 98%, meaning nearly all the image parameter information can be represented by these PCs.

**Figure S2.** Scatter plot for TM endmember spectral extraction.

**Figure S3.** Scatter plot for OLI endmember spectral extraction.

**Figure S4.** Area and proportion of coastal wetlands in the YRD from 1991 to 2020.

**Figure S5.** The transitions of coastal wetlands in the YRD from 1991 to 2020.

## Supplementary Tables S1-S6

**Table S1.** List of remote sensing image data.

**Table S2.** Training and validation samples (pixels) for coastal wetlands during the period of 1991-2020.

**Table S3.** Accuracy assessment of coastal wetlands classification during the period of 1991-2020.

**Table S4.** Landscape-level indices for coastal wetlands during the period of 1991-2020.

**Table S5.** Class-level indices for coastal wetlands during the period of 1991-2020.

**Table S6.** Classification system based on GlobeLand30 for comparison.

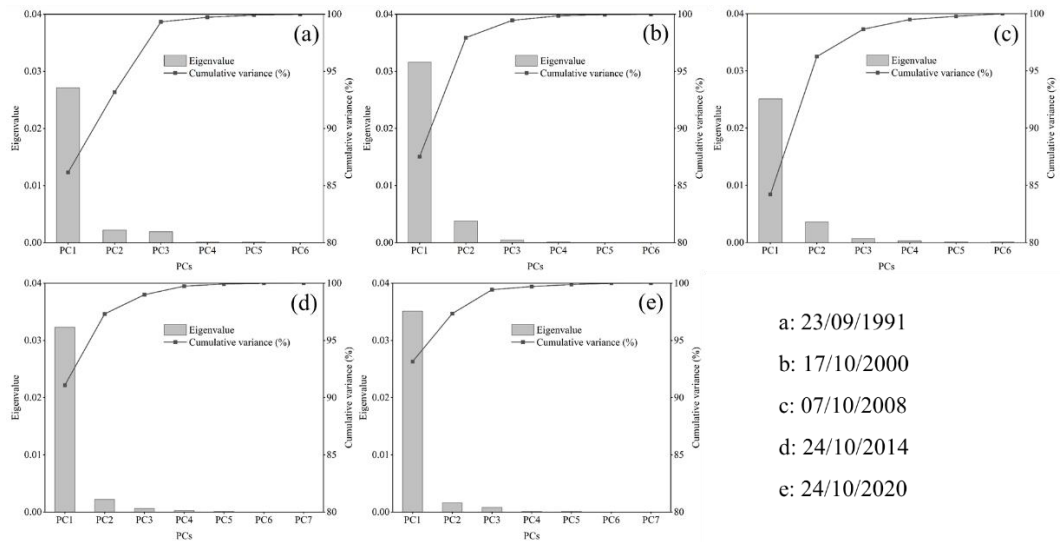

**Figure S1.** Eigenvalues ordered highest to zero, and cumulative PC variance (%). The cumulative variance of the three primary PCs (PC1 to PC3), was greater than 98%, meaning nearly all the image parameter information can be represented by these PCs.

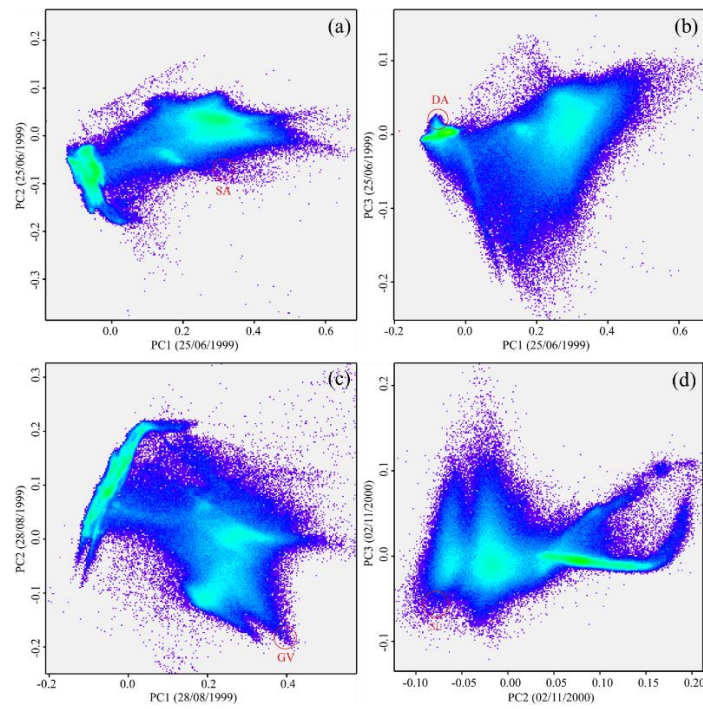

**Figure S2.** Scatter plot for TM endmember spectral extraction.

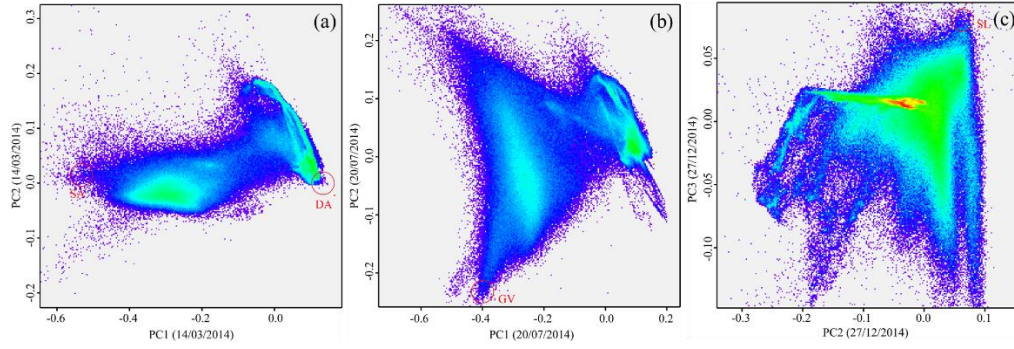

**Figure S3.** Scatter plot for OLI endmember spectral extraction.

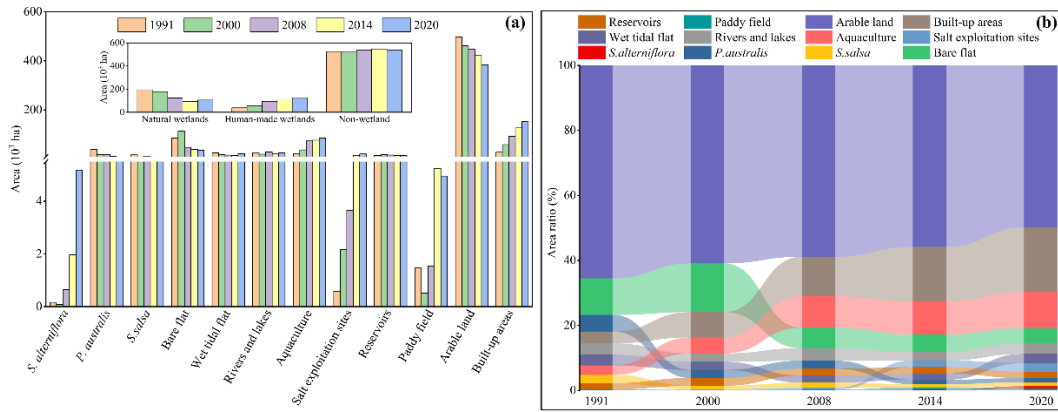

**Figure S4.** Area and proportion of coastal wetlands in the YRD from 1991 to 2020.

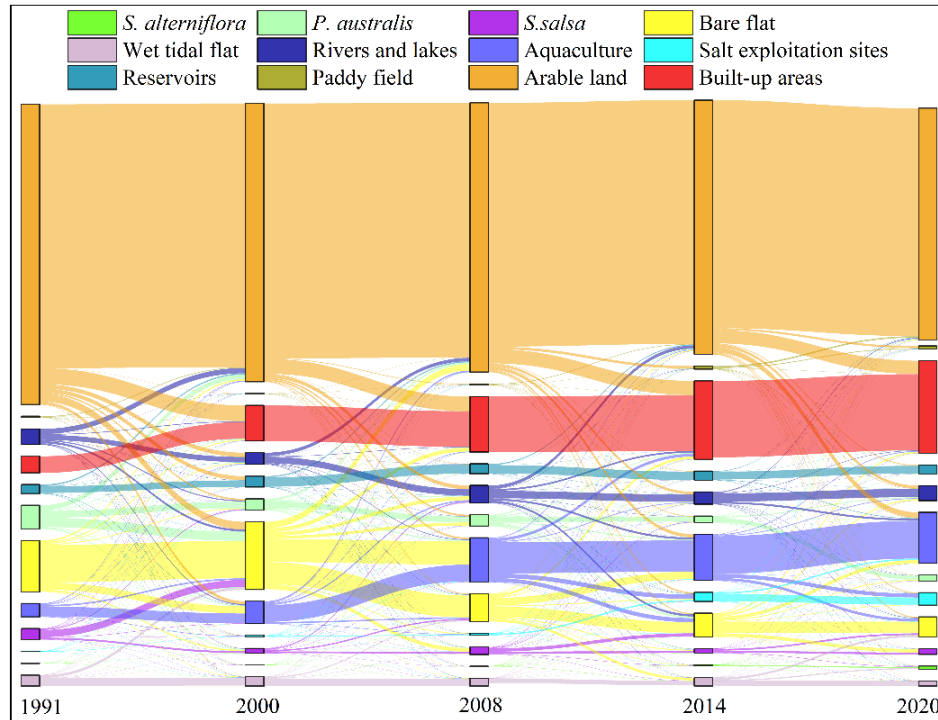

**Figure S5.** The transitions of coastal wetlands in the YRD from 1991 to 2020.

**Table S1.** List of remote sensing image data.

| Image         | Mapping year | Acquisition date | Path/row | Spatial resolution |
|---------------|--------------|------------------|----------|--------------------|
| Landsat-5 TM  | 1991         | 18/05/1991       | 121/034  | 30 m               |
|               |              | 07/09/1991       | 121/034  |                    |
|               |              | 23/09/1991       | 121/034  |                    |
|               | 2000         | 25/06/1999       | 121/035  |                    |
|               |              | 28/08/1999       | 121/035  |                    |
|               |              | 17/10/2000       | 121/034  |                    |
|               |              | 02/11/2000       | 121/034  |                    |
|               |              | 03/07/2008       | 121/035  |                    |
|               |              | 07/10/2008       | 121/035  |                    |
|               |              | 19/05/2009       | 121/035  |                    |
| Landsat-8 OLI | 2014         | 14/03/2014       | 121/034  |                    |
|               |              | 20/07/2014       | 121/034  |                    |
|               |              | 24/10/2014       | 121/034  |                    |
|               |              | 27/12/2014       | 121/034  |                    |
|               | 2020         | 14/03/2020       | 121/034  |                    |
|               |              | 15/04/2020       | 121/034  |                    |
|               |              | 01/05/2020       | 121/034  |                    |
|               |              | 20/07/2020       | 121/034  |                    |
|               |              | 24/10/2020       | 121/034  |                    |

**Table S2.** Training and validation samples (pixels) for coastal wetlands during the period of 1991-2020.

| Classes | 1991     |            | 2000     |            | 2008     |            | 2014     |            | 2020     |            |
|---------|----------|------------|----------|------------|----------|------------|----------|------------|----------|------------|
|         | Training | Validation |
| SA      | 12       | 30         | 7        | 24         | 44       | 31         | 26       | 26         | 90       | 58         |
| PA      | 130      | 73         | 218      | 84         | 228      | 106        | 86       | 94         | 89       | 91         |
| SS      | 161      | 79         | 86       | 63         | 131      | 98         | 71       | 56         | 135      | 111        |
| BF      | 161      | 69         | 442      | 147        | 267      | 107        | 190      | 113        | 191      | 165        |
| WF      | 75       | 44         | 124      | 70         | 70       | 47         | 33       | 55         | 65       | 63         |
| RL      | 152      | 75         | 198      | 97         | 235      | 113        | 121      | 74         | 186      | 145        |
| AQ      | 110      | 72         | 235      | 127        | 287      | 116        | 219      | 125        | 327      | 193        |
| SE      | 10       | 33         | 37       | 45         | 73       | 41         | 70       | 66         | 67       | 73         |
| RE      | 90       | 53         | 90       | 55         | 124      | 46         | 92       | 55         | 80       | 72         |
| PF      | 29       | 30         | 36       | 25         | 46       | 23         | 114      | 71         | 125      | 77         |
| AL      | 338      | 215        | 522      | 137        | 448      | 169        | 226      | 182        | 398      | 246        |
| BR      | 90       | 95         | 343      | 114        | 148      | 113        | 171      | 128        | 181      | 173        |

\* *S. alterniflora* (SA), *P. australis* (PA), *S. salsa* (SS), Bare flat (BF), Wet tidal flat (WF), Rivers and lakes (RL), Aquaculture (AQ), Salt exploitation sites (SE), Reservoirs (RE), Paddy field (PF), Arable land (AL), Built-up areas (BR).

**Table S3.** Accuracy assessment of coastal wetlands classification during the period of 1991-2020.

| Year | Accuracy | SA     | PA    | SS    | BF    | WF    | RL    | AQ    | SE    | RE    | PF    | AL    | BR    |
|------|----------|--------|-------|-------|-------|-------|-------|-------|-------|-------|-------|-------|-------|
| 1991 | PA(%)    | 97.67  | 97.26 | 98.73 | 98.51 | 97.73 | 96.15 | 98.61 | 97.14 | 96.23 | 96.55 | 97.21 | 94.68 |
|      | UA(%)    | 97.67  | 95.95 | 97.50 | 97.06 | 95.56 | 99.01 | 97.26 | 97.14 | 96.23 | 96.55 | 96.76 | 97.80 |
|      | OA(%)    | 97.14  |       |       |       |       |       |       |       |       |       |       |       |
|      | KC       | 0.97   |       |       |       |       |       |       |       |       |       |       |       |
| 2000 | PA(%)    | 100.00 | 98.70 | 98.39 | 97.22 | 97.10 | 95.88 | 97.40 | 97.73 | 96.36 | 96.00 | 96.35 | 94.74 |
|      | UA(%)    | 95.83  | 96.20 | 96.83 | 95.89 | 95.71 | 97.89 | 97.40 | 96.83 | 94.64 | 92.31 | 99.25 | 97.30 |
|      | OA(%)    | 96.90  |       |       |       |       |       |       |       |       |       |       |       |
|      | KC       | 0.97   |       |       |       |       |       |       |       |       |       |       |       |
| 2008 | PA(%)    | 97.50  | 98.17 | 97.73 | 97.06 | 97.83 | 96.46 | 98.28 | 96.23 | 95.65 | 95.65 | 95.86 | 96.46 |
|      | UA(%)    | 97.50  | 96.40 | 98.85 | 94.29 | 95.74 | 97.32 | 95.80 | 98.08 | 97.78 | 91.67 | 98.78 | 97.32 |
|      | OA(%)    | 96.95  |       |       |       |       |       |       |       |       |       |       |       |
|      | KC       | 0.97   |       |       |       |       |       |       |       |       |       |       |       |
| 2014 | PA(%)    | 96.08  | 97.70 | 98.41 | 97.25 | 96.36 | 95.95 | 96.32 | 98.44 | 96.36 | 95.83 | 96.70 | 95.31 |
|      | UA(%)    | 98.00  | 96.59 | 93.94 | 96.36 | 94.64 | 93.42 | 99.37 | 95.45 | 98.15 | 98.57 | 96.17 | 96.83 |
|      | OA(%)    | 96.65  |       |       |       |       |       |       |       |       |       |       |       |
|      | KC       | 0.96   |       |       |       |       |       |       |       |       |       |       |       |
| 2020 | PA(%)    | 97.06  | 97.75 | 97.50 | 97.50 | 96.83 | 96.55 | 98.45 | 97.26 | 95.83 | 97.40 | 97.97 | 95.95 |
|      | UA(%)    | 95.65  | 95.60 | 99.15 | 96.89 | 98.39 | 97.22 | 97.44 | 95.95 | 98.57 | 98.68 | 98.77 | 94.86 |
|      | OA(%)    | 97.30  |       |       |       |       |       |       |       |       |       |       |       |
|      | KC       | 0.97   |       |       |       |       |       |       |       |       |       |       |       |

\* Producer's Accuracy (PA), User's Accuracy (UA), Overall Accuracy (OA), Kappa Coefficient (KC). *S. alterniflora* (SA), *P. australis* (PA), *S. salsa* (SS), Bare flat (BF), Wet tidal flat (WF), Rivers and lakes (RL), Aquaculture (AQ), Salt exploitation sites (SE), Reservoirs (RE), Paddy field (PF), Arable land (AL), Built-up areas (BR).

**Table S4.** Landscape-level indices for coastal wetlands during the period of 1991-2020.

| Year | NP       | PD   | LPI   | LSI   | PAFRAC | SHDI | SHEI | AI    |
|------|----------|------|-------|-------|--------|------|------|-------|
| 1991 | 23964.00 | 3.15 | 35.10 | 49.73 | 1.29   | 1.32 | 0.53 | 96.78 |
| 2000 | 37824.00 | 5.00 | 28.83 | 68.82 | 1.30   | 1.37 | 0.55 | 95.49 |
| 2008 | 47102.00 | 6.21 | 29.35 | 85.47 | 1.32   | 1.46 | 0.59 | 94.33 |
| 2014 | 32204.00 | 4.27 | 27.27 | 74.54 | 1.29   | 1.50 | 0.60 | 95.07 |
| 2020 | 33356.00 | 4.33 | 23.76 | 78.70 | 1.29   | 1.62 | 0.65 | 94.81 |

\* Number of Patches (NP), Patch Density (PD), Largest Patch Index (LPI), Landscape Shape Index (LSI), Perimeter-Area Fractal Dimension (PAFRAC), Shannon's Diversity Index (SHDI), Shannon's Evenness Index (SHEI), and Aggregation Index (AI).

**Table S5.** Class-level indices for coastal wetlands during the period of 1991-2020.

| Classes                 | Year | NP      | PD   | LPI  | LSI   | PAFRAC | AI    |
|-------------------------|------|---------|------|------|-------|--------|-------|
| <i>S. alterniflora</i>  | 1991 | 27.00   | 0.00 | 0.01 | 6.52  | 1.26   | 86.53 |
|                         | 2000 | 22.00   | 0.00 | 0.01 | 4.64  | 1.20   | 87.38 |
|                         | 2008 | 159.00  | 0.02 | 0.02 | 11.43 | 1.26   | 87.54 |
|                         | 2014 | 41.00   | 0.01 | 0.15 | 5.91  | 1.16   | 96.65 |
|                         | 2020 | 94.00   | 0.01 | 0.26 | 9.48  | 1.21   | 96.45 |
| <i>P. australis</i>     | 1991 | 2574.00 | 0.34 | 1.08 | 34.51 | 1.27   | 94.89 |
|                         | 2000 | 3194.00 | 0.42 | 0.79 | 39.86 | 1.29   | 91.47 |
|                         | 2008 | 2539.00 | 0.33 | 0.67 | 39.57 | 1.30   | 91.53 |
|                         | 2014 | 627.00  | 0.08 | 0.62 | 17.73 | 1.25   | 95.13 |
|                         | 2020 | 488.00  | 0.06 | 0.31 | 19.52 | 1.24   | 94.32 |
| <i>S. salsa</i>         | 1991 | 2894.00 | 0.38 | 0.40 | 53.49 | 1.33   | 88.57 |
|                         | 2000 | 839.00  | 0.11 | 0.33 | 33.51 | 1.35   | 89.12 |
|                         | 2008 | 2458.00 | 0.32 | 0.30 | 52.70 | 1.34   | 86.06 |
|                         | 2014 | 273.00  | 0.04 | 0.47 | 15.26 | 1.26   | 94.94 |
|                         | 2020 | 266.00  | 0.03 | 0.48 | 17.19 | 1.27   | 94.97 |
| Bare flat               | 1991 | 2934.00 | 0.39 | 2.65 | 44.77 | 1.32   | 95.51 |
|                         | 2000 | 6907.00 | 0.91 | 2.74 | 54.63 | 1.34   | 95.22 |
|                         | 2008 | 6225.00 | 0.82 | 0.63 | 75.48 | 1.36   | 89.74 |
|                         | 2014 | 3491.00 | 0.46 | 1.40 | 46.54 | 1.31   | 93.11 |
|                         | 2020 | 2983.00 | 0.39 | 1.64 | 46.72 | 1.32   | 92.72 |
| Wet tidal flat          | 1991 | 277.00  | 0.04 | 1.33 | 13.07 | 1.24   | 97.72 |
|                         | 2000 | 229.00  | 0.03 | 0.64 | 10.21 | 1.23   | 97.99 |
|                         | 2008 | 432.00  | 0.06 | 0.69 | 11.93 | 1.26   | 97.39 |
|                         | 2014 | 132.00  | 0.02 | 0.50 | 10.01 | 1.20   | 97.72 |
|                         | 2020 | 88.00   | 0.01 | 1.37 | 8.86  | 1.20   | 98.40 |
| Rivers and lakes        | 1991 | 4899.00 | 0.64 | 1.00 | 75.68 | 1.34   | 86.16 |
|                         | 2000 | 5464.00 | 0.72 | 0.65 | 84.35 | 1.36   | 82.04 |
|                         | 2008 | 8369.00 | 1.10 | 0.75 | 94.88 | 1.35   | 83.48 |
|                         | 2014 | 2638.00 | 0.35 | 0.39 | 55.22 | 1.28   | 88.66 |
|                         | 2020 | 3902.00 | 0.51 | 0.61 | 60.95 | 1.29   | 88.70 |
| Aquaculture             | 1991 | 2397.00 | 0.32 | 0.42 | 31.54 | 1.23   | 93.84 |
|                         | 2000 | 4220.00 | 0.56 | 0.68 | 50.20 | 1.26   | 92.34 |
|                         | 2008 | 4112.00 | 0.54 | 1.74 | 38.50 | 1.29   | 95.85 |
|                         | 2014 | 1819.00 | 0.24 | 4.46 | 33.21 | 1.27   | 96.51 |
|                         | 2020 | 2748.00 | 0.36 | 4.68 | 38.01 | 1.25   | 96.19 |
| Salt exploitation sites | 1991 | 67.00   | 0.01 | 0.03 | 6.64  | 1.14   | 92.92 |
|                         | 2000 | 395.00  | 0.05 | 0.07 | 11.42 | 1.18   | 93.25 |
|                         | 2008 | 219.00  | 0.03 | 0.09 | 12.37 | 1.15   | 94.32 |
|                         | 2014 | 1728.00 | 0.23 | 0.53 | 33.09 | 1.27   | 92.19 |
|                         | 2020 | 765.00  | 0.10 | 0.53 | 21.91 | 1.23   | 95.63 |



|             |      |        |      |      |       |      |       |
|-------------|------|--------|------|------|-------|------|-------|
| Reservoirs  | 1991 | 226.00 | 0.03 | 0.70 | 10.02 | 1.11 | 97.77 |
|             | 2000 | 256.00 | 0.03 | 0.60 | 11.56 | 1.11 | 97.64 |
|             | 2008 | 238.00 | 0.03 | 0.60 | 11.55 | 1.12 | 97.52 |
|             | 2014 | 101.00 | 0.01 | 0.60 | 9.99  | 1.13 | 97.78 |
|             | 2020 | 88.00  | 0.01 | 0.62 | 10.11 | 1.15 | 97.75 |
| Paddy field | 1991 | 795.00 | 0.10 | 0.01 | 28.26 | 1.24 | 78.39 |
|             | 2000 | 455.00 | 0.06 | 0.01 | 21.69 | 1.22 | 71.98 |
|             | 2008 | 940.00 | 0.12 | 0.01 | 32.09 | 1.23 | 75.91 |
|             | 2014 | 663.00 | 0.09 | 0.13 | 25.44 | 1.21 | 89.83 |
|             | 2020 | 648.00 | 0.08 | 0.04 | 28.13 | 1.22 | 88.38 |

\* Number of Patches (NP), Patch Density (PD), Largest Patch Index (LPI), Landscape Shape Index (LSI), Perimeter-Area Fractal Dimension (PAFRAC), and Aggregation Index (AI).

**Table S6.** Classification system based on GlobeLand30 for comparison.

| GlobeLand30         | YRD                     |
|---------------------|-------------------------|
| Wetland             | <i>S. alterniflora</i>  |
|                     | <i>P. australis</i>     |
|                     | <i>S.salsa</i>          |
|                     | Bare flat               |
|                     | Wet tidal flat          |
| Water bodies        | Rivers and lakes        |
|                     | Aquaculture             |
|                     | Salt exploitation sites |
|                     | Reservoirs              |
| Cultivated land     | Paddy field             |
|                     | Arable land             |
| Artificial surfaces | Built-up areas          |
